# Supplementary material
Source: publisher site journal article supplement (https://www.dovepress.com/article/490258)
Supplement: Supplementary file 1 [file get_supplementary_file.php]

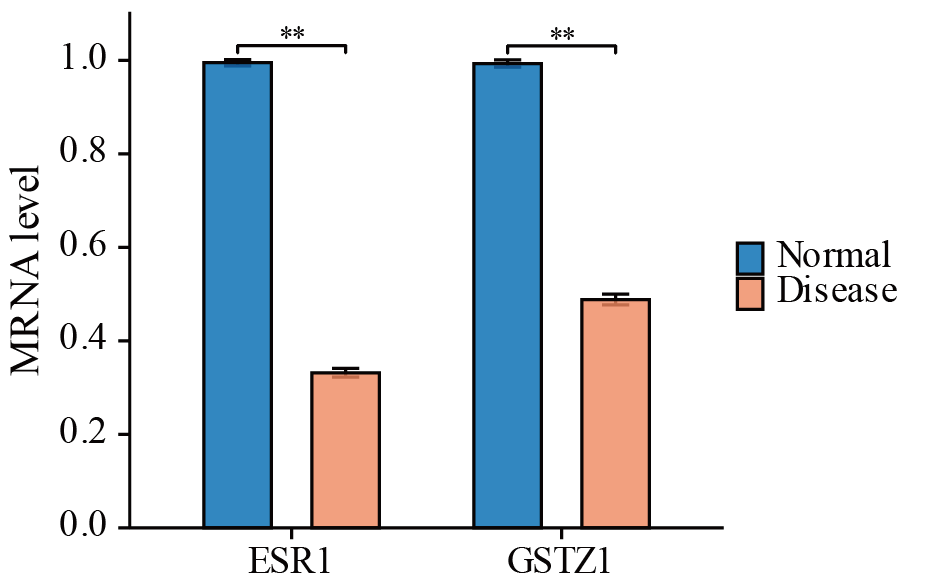


Figure S1 The mRNA levels of ESR1 and GSTZ1 in G2 and L02 cells. Blue represents the L02 normal group, and red represents the G2 disease group. **P<0.01.

Table S1 List of ferroptosis-related genes

| Gene symbol |
| --- |
| A2M-AS1 |
| AADAC |
| ABCC1 |
| ABCC5 |
| ABHD12 |
| ACACA |
| ACO1 |
| ACSF2 |
| ACSL1 |
| ACSL3 |
| ACSL4 |
| ACVR1B |
| ADAM23 |
| ADAMTS9-AS1 |
| ADIPOR1 |
| AEBP1 |
| AGAP2-AS1 |
| AGPS |
| AIFM2 |
| AKR1C1 |
| AKR1C2 |
| AKR1C3 |
| ALG3 |
| ALKBH5 |
| ALOX12 |
| ALOX12B |
| ALOX15 |
| ALOX15B |
| ALOX5 |
| ALOXE3 |
| ANGPTL4 |
| ANO1 |
| ANO6 |
| AOC1 |
| APELA |
| APOC1 |
| APOE |
| AR |
| ARF6 |
| ARGLU1-DT |
| ARHGEF26-AS1 |
| ARMC5 |
| ARNTL |
| ARPC1A |
| ASAP2 |
| ASMTL-AS1 |
| ATF2 |
| ATF3 |
| ATF4 |
| ATF6 |
| ATG5 |
| ATG7 |
| ATM |
| ATP5MC3 |
| ATXN8OS |
| AURKA |
| AXL |
| BACH1 |
| BAP1 |
| BBOX1-AS1 |
| BCAT2 |
| BDNF-AS |
| BECN1 |
| BEX1 |
| BMAL1 |
| BMP4 |
| BNC1 |
| BRD4 |
| BRD7 |
| C19orf12 |
| C8orf76 |
| CA9 |
| CAMKK2 |
| CAPRIN2 |
| CARS |
| CARS1 |
| CAV1 |
| CBS |
| CBSLR |
| CCDC6 |
| CCT3 |
| CD38 |
| CD44 |
| CD82 |
| CDC25A |
| CDC27 |
| CDH1 |
| CDKN1A |
| CDKN2A |
| CDO1 |
| CEMIP |
| CERK |
| CERS6-AS1 |
| CGAS |
| CHAC1 |
| CHMP5 |
| CHMP6 |
| CIRBP |
| CISD1 |
| CISD2 |
| CISD3 |
| CLTRN |
| CNR1 |
| COMMD10 |
| COPZ1 |
| COX7A1 |
| CP |
| CPEB1 |
| CPLX2 |
| CRYAB |
| CS |
| CSE |
| CUL9 |
| CX3CL1 |
| CYB5R1 |
| CYGB |
| DDIT4 |
| DDR2 |
| DECR1 |
| DHODH |
| DKK1 |
| DLD |
| DNAJB6 |
| DPP4 |
| ECH1 |
| EGFR |
| EGLN2 |
| EHMT2 |
| EIF4E |
| ELAVL1 |
| ELK1 |
| ELOVL5 |
| EMC2 |
| EMP1 |
| ENO1 |
| ERN1 |
| ESR1 |
| ETHE1 |
| ETV4 |
| EZH2 |
| FABP4 |
| FADS1 |
| FADS2 |
| FAF1 |
| FAM98A |
| FANCD2 |
| FAR1 |
| FBLN1 |
| FBXO31 |
| FBXW7 |
| FDFT1 |
| FGFR4 |
| FH |
| FNDC5 |
| FSCN1 |
| FTH1 |
| FTL |
| FTMT |
| FTO |
| FUNDC2 |
| FXN |
| FXR1 |
| FZD7 |
| G3BP1 |
| G6PD |
| GABARAPL1 |
| GALNT14 |
| GCH1 |
| GCLC |
| GCLM |
| GDF15 |
| GGT1 |
| GJA1 |
| GLRX5 |
| GLS |
| GLS2 |
| GOT1 |
| GPX4 |
| GPX7 |
| GSK3B |
| GSS |
| GSTM1 |
| GSTZ1 |
| H19 |
| HCAR1 |
| HDDC3 |
| HDLBP |
| HELLS |
| HEPFAL |
| HERPUD1 |
| HIF1A |
| HLF |
| HMGB1 |
| HMGCL |
| HMGCR |
| HMOX1 |
| HNRNPD |
| HNRNPL |
| HOXA11-AS |
| HPCAL1 |
| HPX |
| HRH1 |
| hsa_circ_0008367 |
| HSBP1 |
| HSF1 |
| HSPA5 |
| HSPA8 |
| HSPB1 |
| HULC |
| ICA1 |
| IDH1 |
| IDH2 |
| IDO1 |
| IFNA1 |
| IFNG |
| IGF2BP3 |
| IL1B |
| IL6 |
| IREB2 |
| ISCU |
| ITGB3 |
| JUND |
| KAT6B |
| KDM1A |
| KDM3B |
| KDM4A |
| KDM5A |
| KDM5C |
| KDM6B |
| KEAP1 |
| KIF20A |
| KLF2 |
| KLHDC3 |
| LAMP2 |
| LAMTOR5 |
| LCN2 |
| LIFR |
| LONP1 |
| LPCAT3 |
| LRP8 |
| LRRK2 |
| LTBP2 |
| MALAT1 |
| MAPK1 |
| MAPK3 |
| MAPK8 |
| MARCHF6 |
| MAZ |
| MCF2L |
| MCU |
| MDM2 |
| MDM4 |
| ME1 |
| MEF2C |
| MEG8 |
| MEN1 |
| METTL14 |
| METTL16 |
| METTL3 |
| MGST1 |
| MIB1 |
| MICU1 |
| MIOX |
| MITD1 |
| MITF |
| MPC1 |
| MPO |
| MT1DP |
| MT1G |
| MTDH |
| MTF1 |
| MTHFR |
| MTTP |
| MUC1 |
| MXRA8 |
| MYB |
| MYC |
| MYCN |
| NAT10 |
| NCOA4 |
| NEAT1 |
| NEDD4 |
| NEDD4L |
| NF2 |
| NFE2L1 |
| NFE2L2 |
| NFS1 |
| NKAP |
| NOD1 |
| NOTCH3 |
| NOX1 |
| NOX4 |
| NQO1 |
| NR1H4 |
| NSUN5 |
| NTN1 |
| NTRK2 |
| NUAK2 |
| NUP62 |
| NUPR1 |
| OGFRP1 |
| OIP5-AS1 |
| OTUB1 |
| P4HB |
| PANX1 |
| PANX2 |
| PAQR3 |
| PARK7 |
| PCAT1 |
| PCBP1 |
| PCBP2 |
| PCDH7 |
| PCDHB14 |
| PCSK9 |
| PDGFRA |
| PDIA2 |
| PDK4 |
| PDSS2 |
| PEBP1 |
| PEDS1 |
| PELATON |
| PER1 |
| PEX10 |
| PEX12 |
| PEX14 |
| PEX2 |
| PEX3 |
| PGD |
| PGM5P3-AS1 |
| PHGDH |
| PHKG2 |
| PIEZO1 |
| PIM1 |
| PIR |
| PKM2 |
| PLA2G6 |
| PLTP |
| PML |
| POR |
| PPARA |
| PRDX1 |
| PRDX2 |
| PRDX4 |
| PRDX6 |
| PRKAA1 |
| PRKAA2 |
| PRKCA |
| PRKCB |
| PROM2 |
| PSEN1 |
| PSEN2 |
| PSTK |
| PTGS2 |
| PTPMT1 |
| PTPN18 |
| PTPN6 |
| PVT1 |
| PYCR1 |
| QSOX1 |
| RARRES2 |
| RB1 |
| RB1CC1 |
| RBM24 |
| RBMS1 |
| RHEBP1 |
| RND1 |
| RNF113A |
| RPL8 |
| RRM1 |
| RRM2 |
| SAT1 |
| SCARA5 |
| SCD |
| SEC24B |
| SENP1 |
| SESN2 |
| SHARPIN |
| SHP-1 |
| SIAH2 |
| SIRT1 |
| SIRT3 |
| SIRT6 |
| SLC11A2 |
| SLC16A1 |
| SLC16A1-AS1 |
| SLC1A5 |
| SLC25A11 |
| SLC25A28 |
| SLC25A37 |
| SLC39A14 |
| SLC39A7 |
| SLC3A2 |
| SLC40A1 |
| SLC47A1 |
| SLC6A14 |
| SLC7A11 |
| SMG9 |
| SMPD1 |
| SNCA |
| SND1 |
| SOCS1 |
| SOCS2 |
| SOX2 |
| SP1 |
| SQLE |
| SQOR |
| SQSTM1 |
| SRC |
| SREBF1 |
| SREBF2 |
| SRSF1 |
| SRSF9 |
| SSBP1 |
| STAT3 |
| STAT6 |
| STC1 |
| STEAP3 |
| STING |
| STING1 |
| STK11 |
| SUFU |
| SUV39H1 |
| TAFAZZIN |
| TBX1 |
| TCF4 |
| TF |
| TFAM |
| TFAP2A |
| TFRC |
| TGFB2 |
| TGFBR1 |
| TIGAR |
| TILRLS |
| TLR4 |
| TMBIM4 |
| TMEM161B-DT |
| TNF |
| TNFAIP3 |
| TP53 |
| TP63 |
| TRIB2 |
| TRIM26 |
| TRIM46 |
| TRIM59 |
| TRIM7 |
| TRPM2 |
| TRPM7 |
| TRPV1 |
| TSC1 |
| TUG1 |
| TYRO3 |
| UFL1 |
| USF2 |
| USP11 |
| USP14 |
| USP35 |
| VAMP2 |
| VCP |
| VDAC2 |
| WWTR1 |
| YAP1 |
| YTHDC2 |
| YY1AP1 |
| YY2 |
| ZEB1 |
| ZFAS1 |
| ZFP36 |
| ZSCAN25 |

Table S2 The sequences of primers used for RT-PCR

| Genes | Forward primer (5′-3′) | Reverse primer (5′-3′) |
| --- | --- | --- |
| IL1B | GAAATGCCACCTTTTGACAGTG | TGGATGCTCTCATCAGGACAG |
| GSTZ1 | CGCTGAAAATTGATGGAATCACC | GATGCCACTAGCGATGAGGT |
| LIFR | ATGCAAACGGTCTGAAGAGAG | TGGGTGACAAGAATGGAACCT |
| SLC25A37 | CCTACTCCACGATGCAGTAATG | AGTGAATTGACTGGAAGGGGATA |
| PTGS2 | TTCCAATCCATGTCAAAACCGT | AGTCCGGGTACAGTCACACTT |
| MT1G | AAGAGTGAGTTGGGACACCTT | CGAGACAATACAATGGCCTCC |
| HSPB1 | GGTTGCCCGATGAGTGGTC | CTGAGCTGTCGGTTGAGCG |
| ESR1 | CCCGCCTTCTACAGGTCTAAT | CTTTCTCGTTACTGCTGGACAG |
| PHGDH | ATGGCCTTCGCAAATCTGC | AGTTCAGCTATCAGCTCCTCC |
| GPX4 | TGTGCATCCCGCGATGATT | CCCTGTACTTATCCAGGCAGA |
| SLC7A11 | GGCACCGTCATCGGATCAG | CTCCACAGGCAGACCAGAAAA |
| GAPDH | AGGTCGGTGTGAACGGATTTG | GGGGTCGTTGATGGCAACA |

Table S3 Comparison of the results of current study with those from other studies in the literature

| Study | Main Results |
| --- | --- |
| Reference16 | FGF21 is a novel inhibitor of ferroptosis and alleviates liver fibrosis by inhibiting ferroptosis. |
| Reference17 | The absence of TAK1 in hepatocytes leads to ferroptosis and promotes the progression of liver  fibrosis and hepatocellular carcinoma through the cGAS-STING signaling pathway. |
| Reference34 | This study identifies ELAVL1-autophagy-dependent ferroptosis as a potential target for the  treatment of liver fibrosis. |
| Reference35 | This research reveals ZFP36-mediated autophagy-dependent ferroptosis as a promising  therapeutic target for addressing liver fibrosis. |
| Current study | Targeting ESR1 and GSTZ1 to regulate ferroptosis may be a potential approach for the  treatment of hepatic fibrosis. |
